# Supplementary material for: Diffusion Barriers Minimizing the Strength Degradation of Reactive Air Brazed Ba0.5Sr0.5Co0.8Fe0.2O3-δ Membranes during Aging
Source: MDPI journal article supplement (doi:10.3390/membranes13050504), 2023-05-10
Supplement: s1 [file s1]

## Supplemental Material

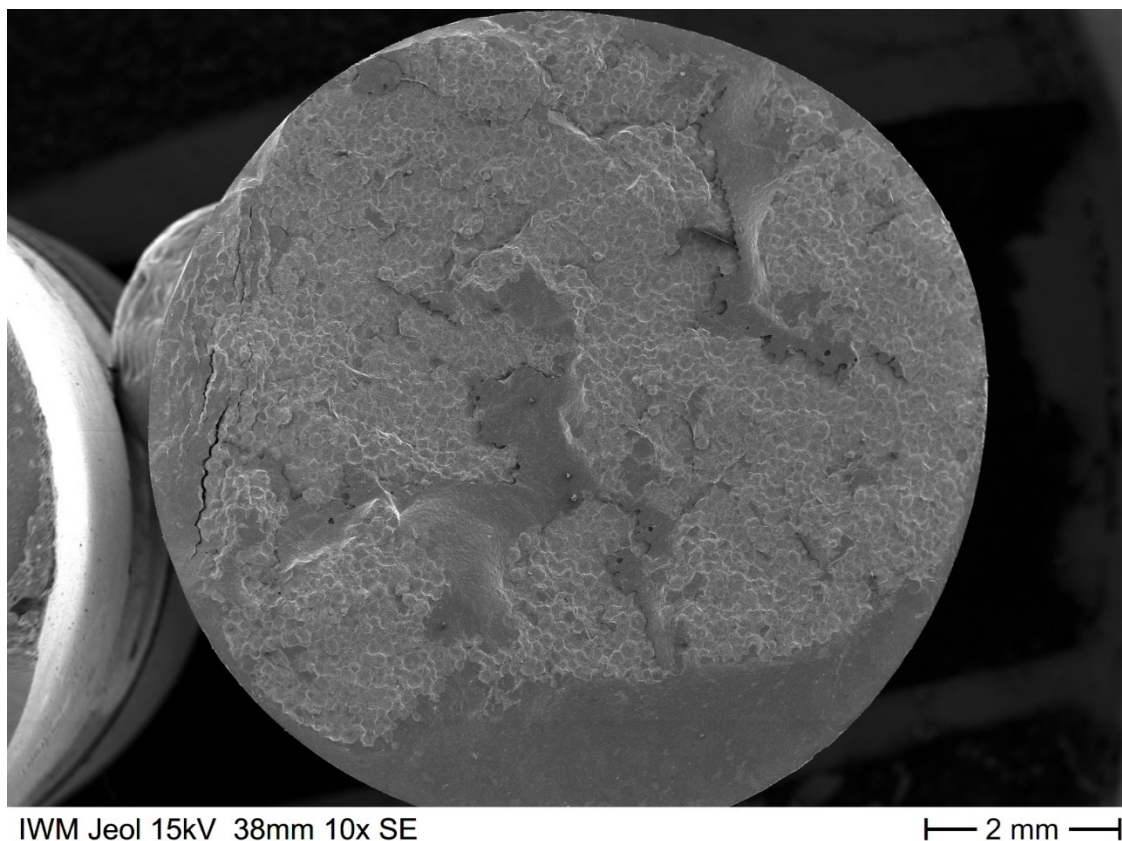

Figure S1: SE image shown as exemplary ceramic fracture type 1 of series Z in Figure 7. The initial granules with  $d_{50} = 125 \mu\text{m}$  are visible. This fracture type 1 occurs mainly in the center of the ceramic sample where the pressure during the uniaxial pre-compaction of the BSCF granules is lowest.

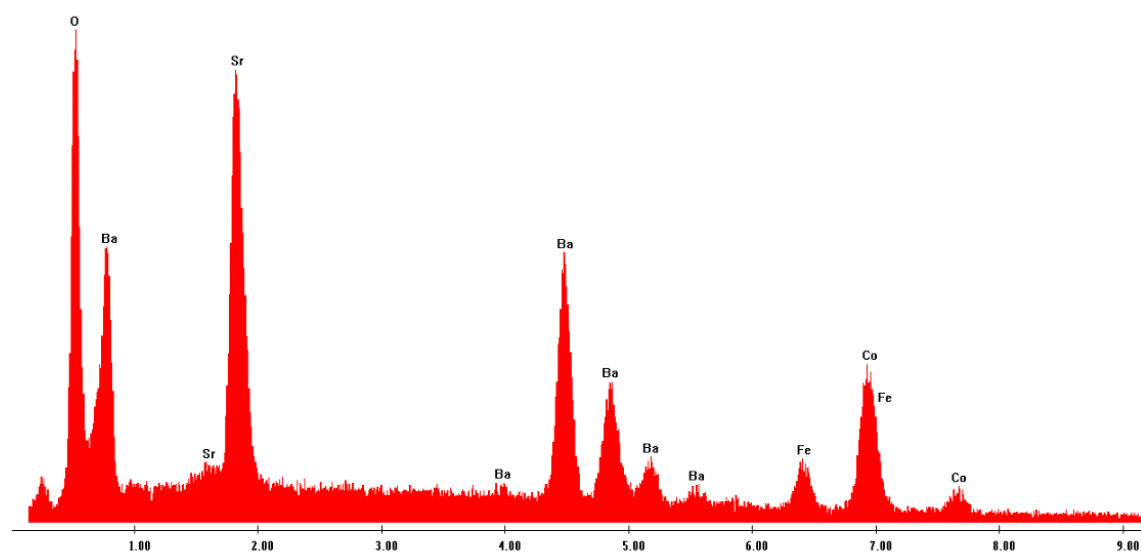

Figure S2: Area EDX measurement on the fracture surface in Figure 1. No chromium or other impurities were detected.

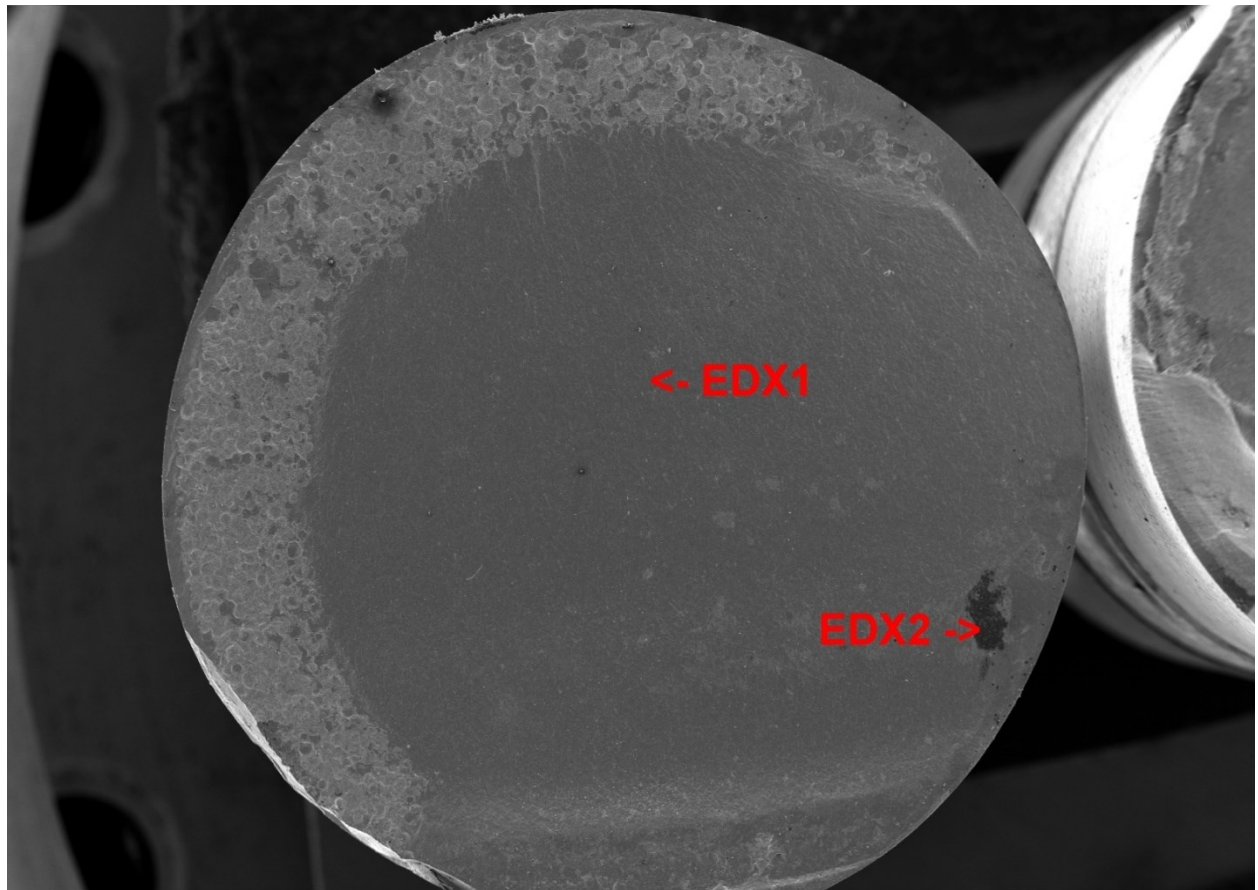

IWM Jeol 15kV 37mm 10x SE

— 2 mm —

**Figure S3: SE image shown as exemplary ceramic fracture type 2 of series Z in Figure 7. The point EDX analyses revealing no chromium poisoning, but local Na, K, Cl contamination are given in Figure 4 and 5, respectively.**

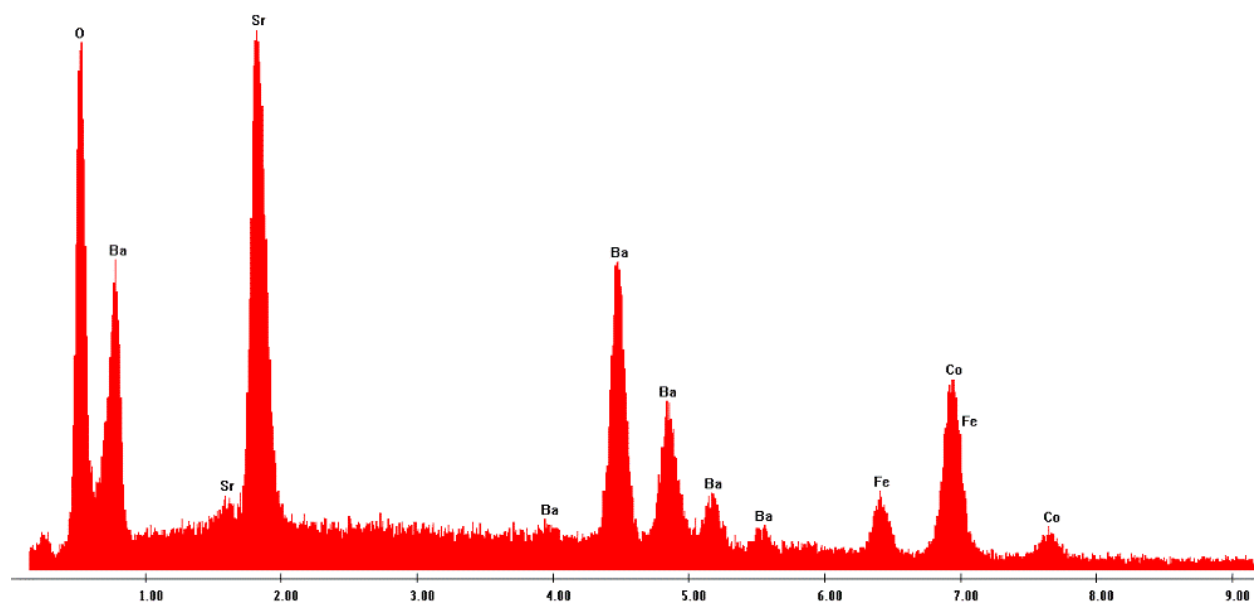

Figure S4: EDX1, position marked in Figure 3

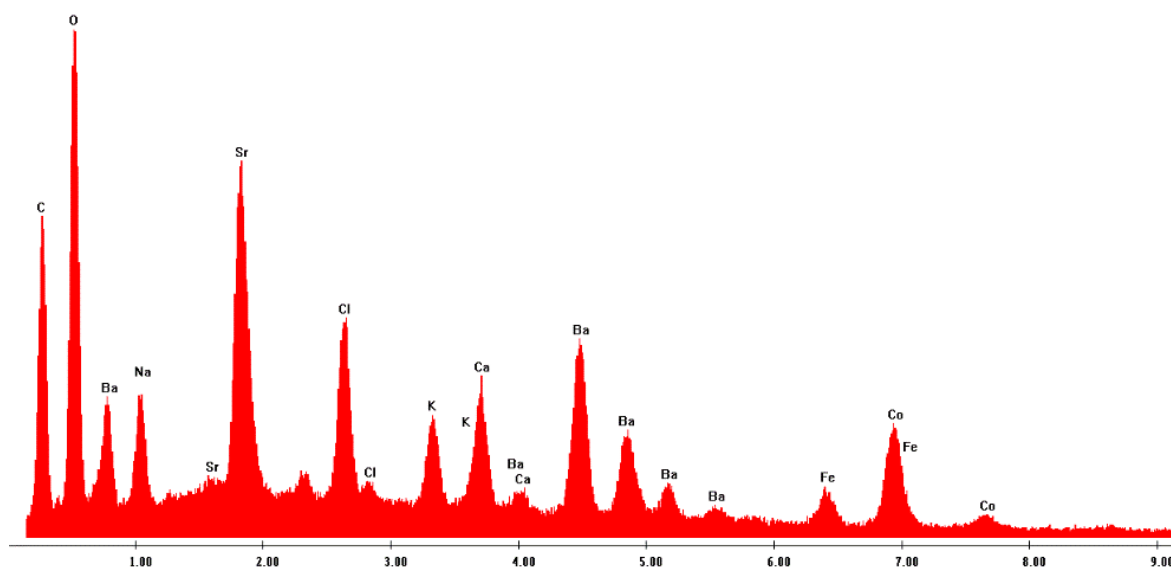

Figure S5: EDX2, position marked in Figure 3

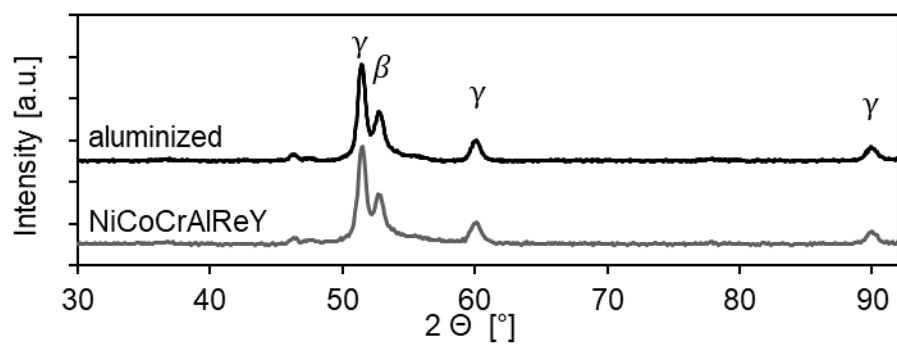

Figure S6: XRD phase analysis on aluminized and 1 h pre-oxidized AISI314 and on NiCoCrAlReY coated AISI314.
